# Supplementary material
Source: MDPI journal article supplement (https://www.mdpi.com/2071-1050/11/13/3727)
Supplement: s1 [file s1]

## Configuring new business models for circular economy through product-service systems

Marina P. P. Pieroni <sup>1\*</sup>, Tim C. McAloone <sup>1</sup> and Daniela C. A. Pigosso <sup>1</sup>

### Supplementary Materials A

Table S1: cases for the Furniture sector embedded in the CE-Driven Business Model Configurator. Legend for sources: 1- Ellen Macarthur Foundation [1]; 2 – Knowledge Hub [2]; 3 - Official reports funded by the Nordic Council of Ministers; 4 – Academic works [3,4]; 5 - Snowballing and companies websites

| Code | Case company                               | Sources |
|------|--------------------------------------------|---------|
| CF01 | Auping                                     | 1       |
| CF02 | Biofurniture                               | 1       |
| CF03 | Brabantia                                  | 1       |
| CF04 | Casamania                                  | 1       |
| CF05 | Cirkel                                     | 1       |
| CF06 | COCO-MAT                                   | 1       |
| CF07 | Data city                                  | 5       |
| CF08 | Desko                                      | 1       |
| CF09 | Desso                                      | 1       |
| CF10 | DSM Niaga® Technology                      | 1       |
| CF11 | Emblem furniture                           | 5       |
| CF12 | Emeco                                      | 1       |
| CF13 | Furnishare                                 | 2       |
| CF14 | GH Form                                    | 3       |
| CF15 | Gispen                                     | 1; 4    |
| CF16 | IKEA                                       | 5       |
| CF17 | Interface - Fishing nets                   | 1       |
| CF18 | Interface - Evergreen lease (discontinued) | 1       |
| CF19 | Kaiyo                                      | 5       |
| CF20 | Lithuanian designer Mindaugas Zillions     | 2       |
| CF21 | Martela                                    | 3       |
| CF22 | Opendesk                                   | 1       |

|      |                                                 |   |
|------|-------------------------------------------------|---|
| CF23 | Orangebox and Premier Sustaiain (joint venture) | 1 |
| CF24 | Re-Worked by Adam Fairweather                   | 1 |
| CF25 | Rype office                                     | 2 |
| CF26 | ShareDesk                                       | 1 |
| CF27 | Steelcase 1                                     | 2 |
| CF28 | Steelcase 2                                     | 2 |
| CF29 | Steelcase 3                                     | 2 |
| CF30 | Steelcase 4                                     | 2 |
| CF31 | Studio Bernardita Marambio                      | 1 |
| CF32 | Studio Tjeerd Veenhoven                         | 1 |
| CF33 | Valpas                                          | 5 |
| CF34 | Vitsøe                                          | 4 |
| CF35 | Zuo                                             | 5 |

## Supplementary Materials B

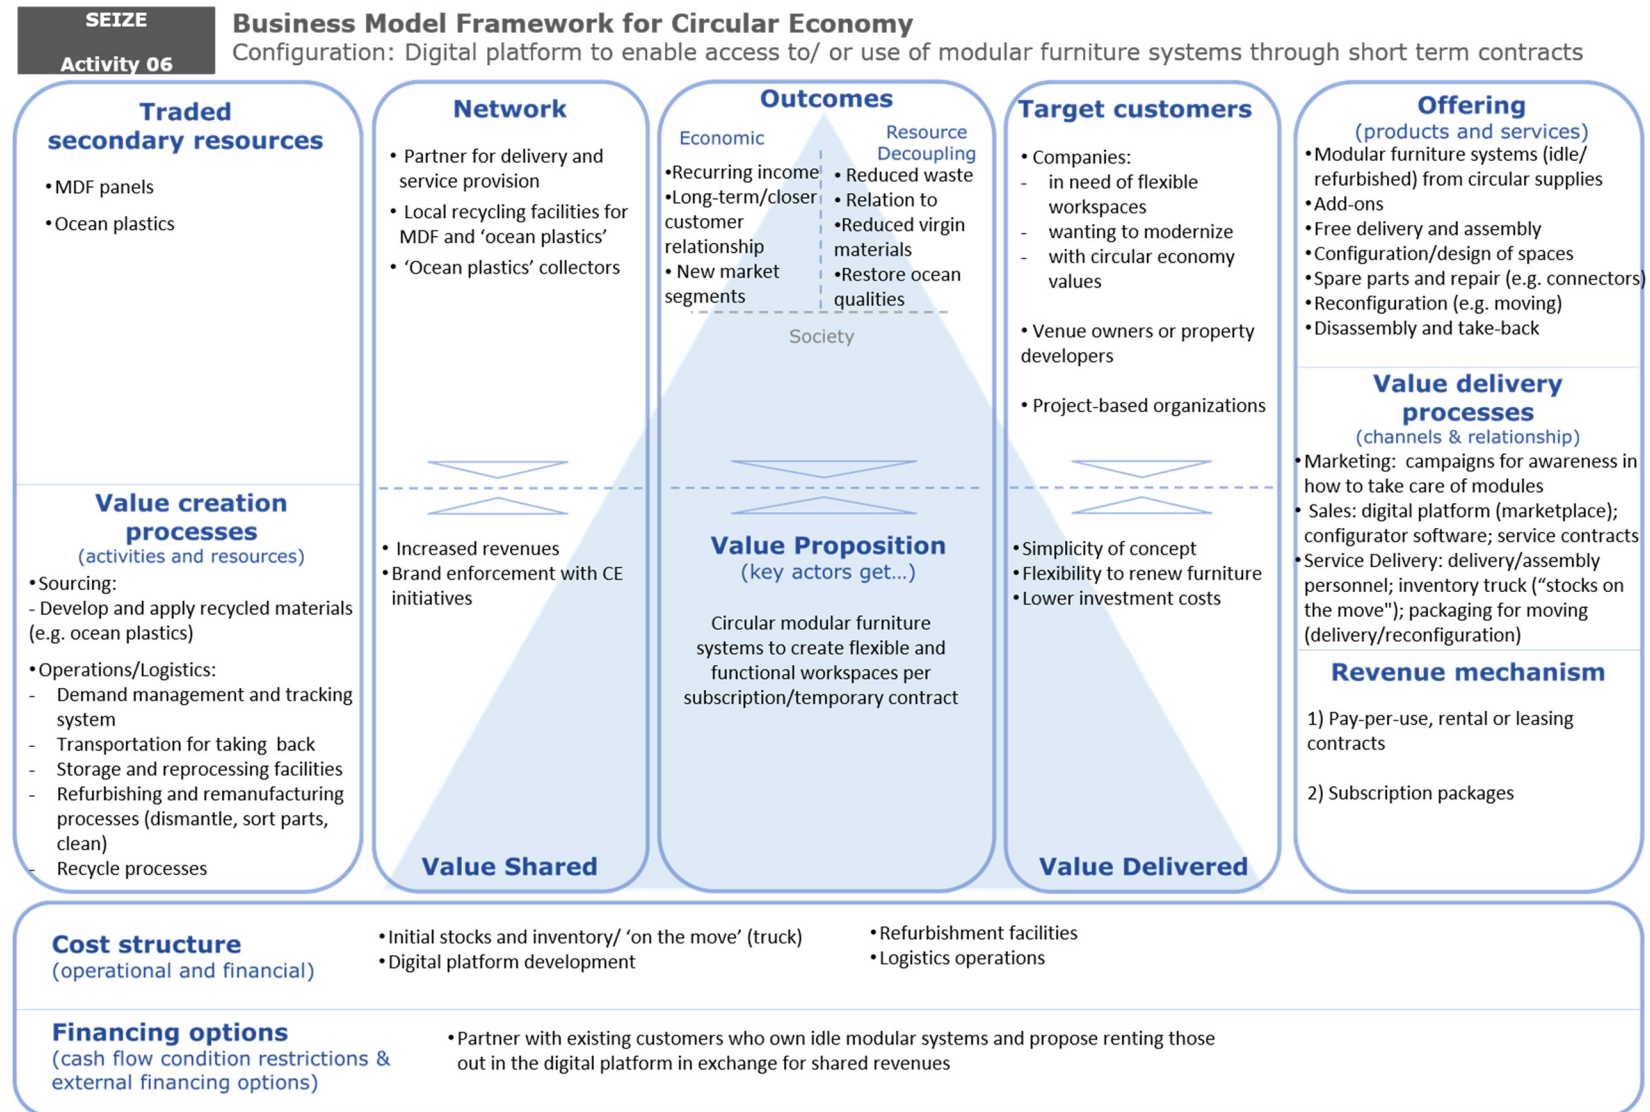

Figure S1: CE-oriented PSS BM concept for Ope (adapted from Biloslavo et al. [5], Kraaijenhagen et al. [6] and Osterwalder and Pigneur [7]).

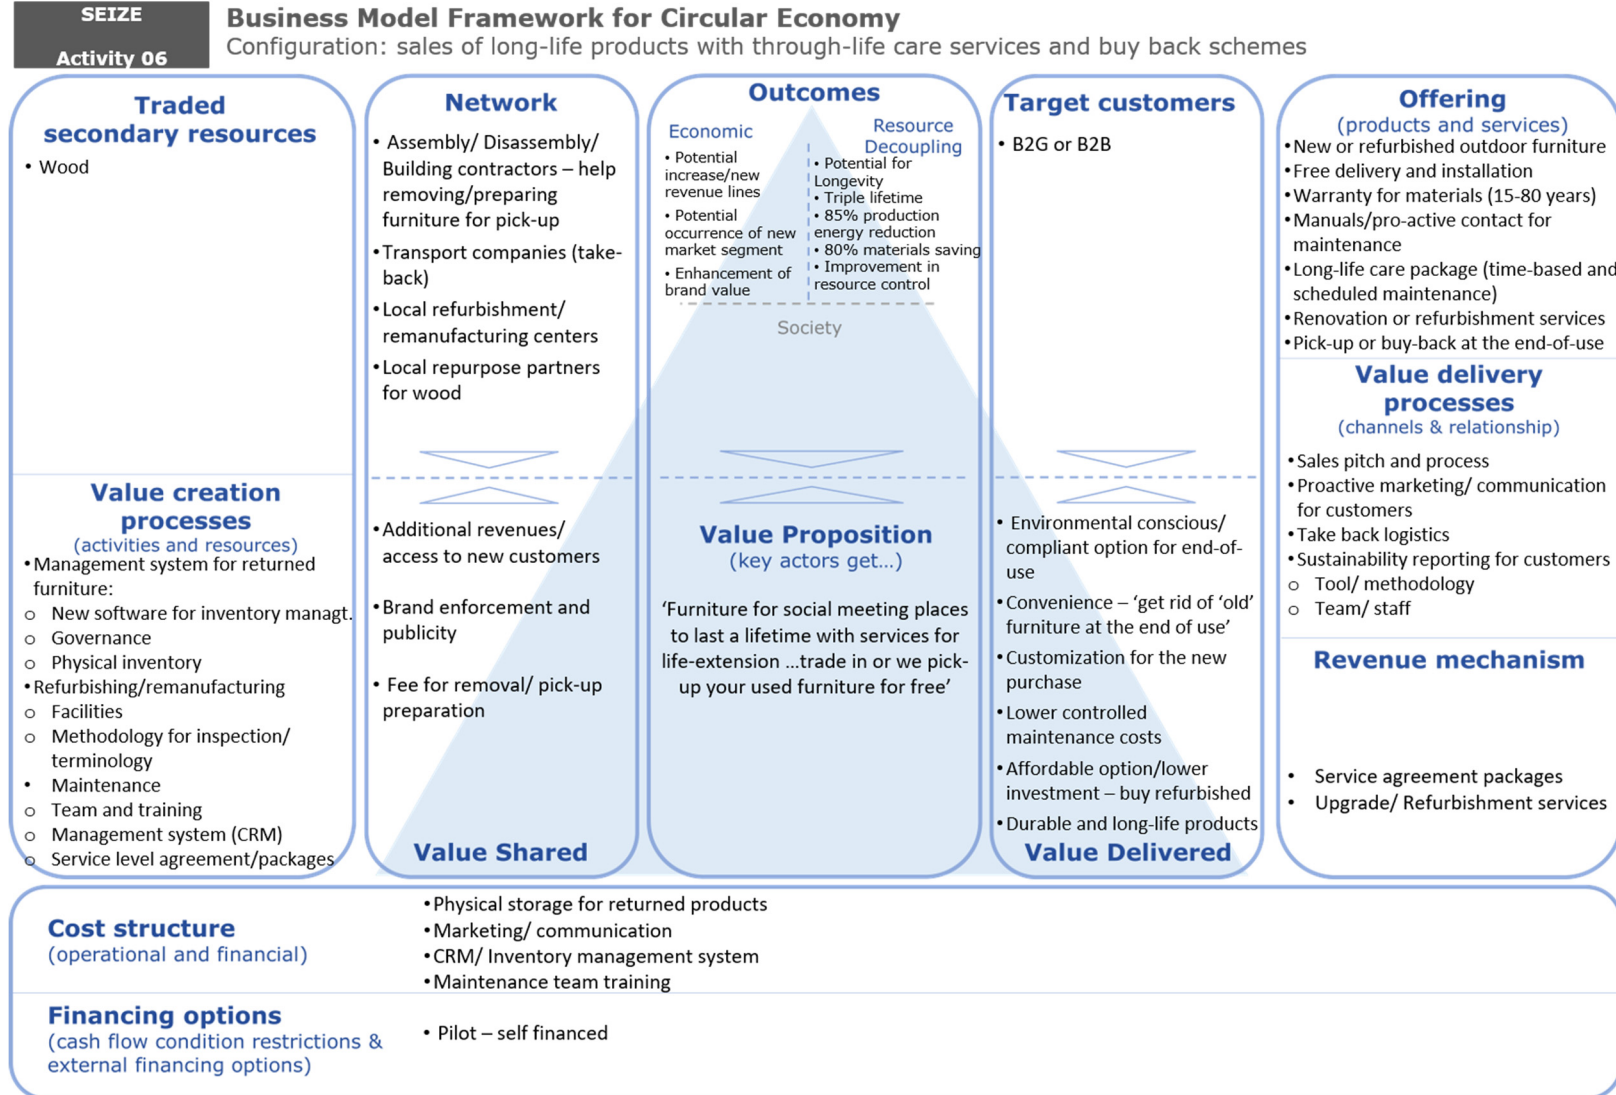

Figure S2: CE-oriented PSS BM concept for Vestre, configuration 1 (adapted from Biloslavo et al. [5], Kraaijenhagen et al. [37] and Osterwalder and Pigneur [38]).

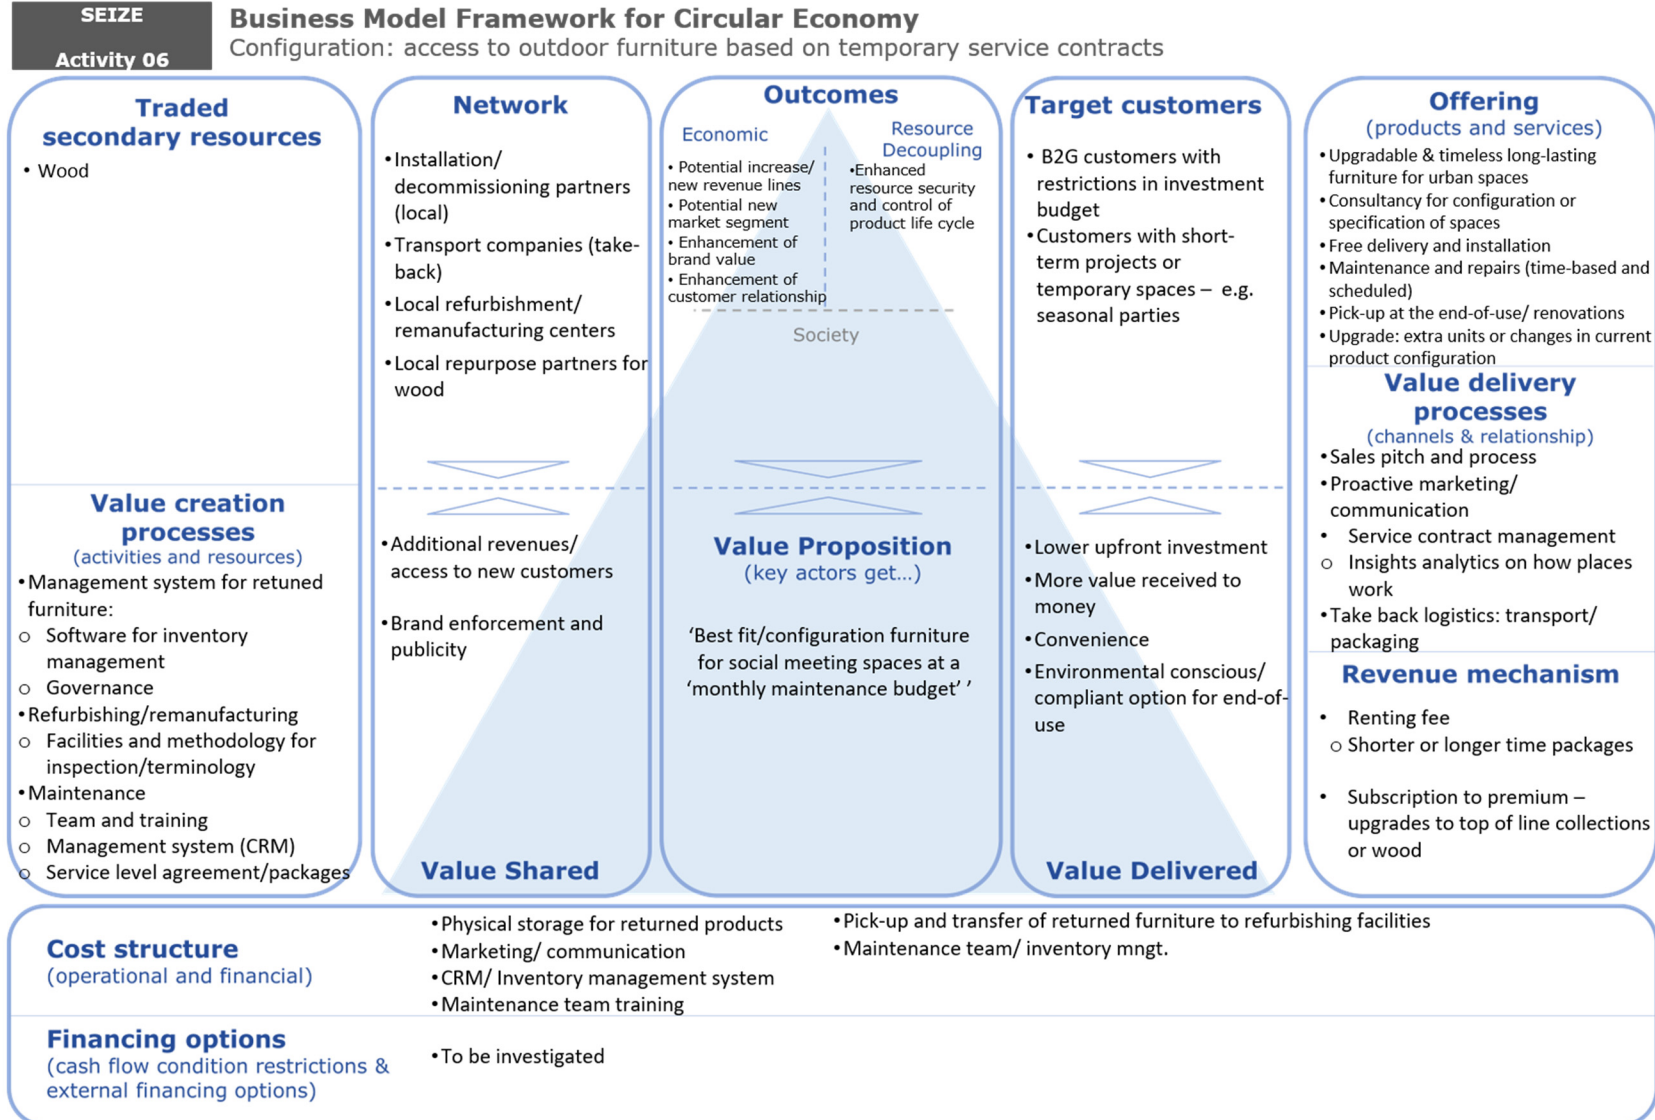

Figure S3: CE-oriented PSS BM concept for Vestre, configuration 2 (adapted from Biloslavo et al. [5], Kraaijenhagen et al. [37] and Osterwalder and Pigneur [38]).

## References

1. EMF *Circular Economy Case Studies*.; <https://www.ellenmacarthurfoundation.org/case-studies> (accessed 23 September 2018), 2018;
2. Knowledge Hub Case studies and articles. [online] Available online: <https://circle-lab.com/knowledge-hub/all-content> (accessed on Sep 23, 2018).
3. Bocken, N.M.P.; Short, S.W. Towards a sufficiency-driven business model: Experiences and opportunities. *Environ. Innov. Soc. Transitions* **2016**, *18*, 41–61.
4. Bosch, T.; Verploegen, K.; Grösser, S.N.; van Rhijn, G. Sustainable Furniture that Grows with End-Users. In *Dynamics of Long-Life Assets*; Springer International Publishing: Cham, 2017; pp. 303–326 ISBN 9783319454382.
5. Biloslavo, R.; Bagnoli, C.; Edgar, D. An eco-critical perspective on business models: The value triangle as an approach to closing the sustainability gap. *J. Clean. Prod.* **2018**, *174*, 746–762.
6. Kraaijenhagen, C.; Van Open, C.; Bocken, N. *Circular Business Collaborate and Circulate*; Circular Collaboration: The Netherlands, 2016; ISBN 9789082490206.
7. Osterwalder, A.; Pigneur, Y. *Business Model Generation*; Self Published, Amsterdam, 2010; ISBN 9780470876411.
